# Supplementary material
Source: MDPI journal article supplement (https://www.mdpi.com/2571-550X/4/1/6)
Supplement: s1 [file s1]

## Sheet: Feuil1
Years	Authors	Title		Journal	Vol	No	pages	doi	Aim	State	Sediment type	Studied ecosystems	Organisms	Time Period (years cal. BP)	Studied forcing factors	Current climate at site	DNA extraction methods	sediment mass (g)	DNA-based methods	Molecular barcodes	Fragment length (bp)
2020	Alsos et al. 2020	Last Glacial Maximum environmental conditions at Andøya, northern Norway; evidence for a northern ice-edge ecological “hotspot”.	x	Quaternary Science Reviews	239	106364	1-19	10.1016/j.quascirev.2020.106364	Ecology	past	limnic	terrestrial and aquatic	plants	27 000	climate	boreal/subarctic	PowerSoil® DNA Isolation Kit (QIAGEN)	0.3	metabarcoding	trnL	50
2020	Armbrecht et al. 2020	An optimized method for the extraction of ancient eukaryote DNA from marine sediments	x	Molecular Ecology Resources	na	na	na	10.1111/1755-0998.13162	Methodology	past	marine	aquatic	eukaryotes, bacteria, archaea	150	na	temperate	Extraction methods comparison	0.25	shotgun sequencing	na	na
2020	Cao et al. 2020	Sedimentary ancient DNA metabarcoding delineates the contrastingly temporal change of lake cyanobacterial communities	x	Water Research	183	116077	na	10.1016/j.watres.2020.116077	Ecology	past and present	limnic	aquatic	cyanobacteria	170	eutrophication	subtropical	PowerMax® Soil DNA Isolation Kit (QIAGEN)	na	metabarcoding, qPCR	16S rRNA	379
2020	Chen et al. 2020	Interpreting lacustrine bulk sedimentd15N values usingmetagenomics in a tropical hypersaline lake system	x	Journal of Paleolimnology	na	na	1-19	10.1007/s10933-020-00157-7	Ecology	past	hypersaline	aquatic	archaea, eukaryotes, bacteria	1600	nitrogen cycle, organic matter	tropical	Custom protocol	0.5	metagenomics	16S rRNA, rpoB	na
2020	Clarke et al. 2020	A 24,000-year ancient DNA and pollen record from the Polar Urals reveals temporal dynamics of arctic and boreal communities	x	Quaternary Science Reviews	247	106564	1-22	10.1016/j.quascirev.2020.106564	Ecology	past	limnic	terrestrial	plants	24000	climate	arctic-alpine	PowerMax® Soil DNA Isolation Kit (QIAGEN)	10	metabarcoding	trnL	76
2020	Dommain et al. 2020	The Challenges of Reconstructing Tropical Biodiversity With Sedimentary Ancient DNA: A 2200-Year-Long Metagenomic Record From Bwindi Impenetrable Forest, Uganda	x	Frontiers in Ecology and Evolution	8	218	1-26	10.3389/fevo.2020.00218	Ecology	past	peat bog	terrestrial and aquatic	archaea, bacteria, eukaryotes	2200	biodiveristy, taphonomy	tropical	PowerSoil® DNA Isolation Kit (QIAGEN)	0.25	shotgun sequencing	na	na
2020	García-Rodríguez et al. 2020	Centennial glacier retreat increases sedimentation and eutrophication in Subantarctic periglacial lakes: A study case of Lake Uruguay	x	Science of the Total Environment	754	142066	na	10.1016/j.scitotenv.2020.142066	Ecology	present	limnic	terrestrial	bacteria	3200	climate	arctic	FastDNA® Spin Kit for soil (MP biomedicals)	0.3	metagenomics	16S rRNA	na
2020	Garner et al. 2020	Sediment Metagenomes as Time Capsules of Lake Microbiomes	x	mSphere	5	6	1-15	10.1128/mSphere	Ecology	past and present	limnic	aquatic	microbial eukaryotes, bacteria, viruses	120	climate, human activites	boreal	PowerSoil® DNA Isolation Kit (QIAGEN)	0.5	shotgun sequencing	na	na
2020	Huang et al. 2020	Genetic and morphologic determination of diatom community composition in surface sediments from glacial and thermokarst lakes in the Siberian Arctic	x	Journal of Paleolimnology	na	na	1-18	10.1007/s10933-020-00133-1	Ecology	past and present	limnic	aquatic	diatoms	surface sediments	climate	arctic	PowerSoil® DNA Isolation Kit (QIAGEN)	na	metabarcoding	rbcL	76
2020	Ibrahim et al. 2020	Anthropogenic impact on the historical phytoplankton community of Lake Constance reconstructed by multimarker analysis of sediment‐core environmental DNA	x	Molecular Ecology	na	na	na	10.1111/mec.15696	Ecology	past and present	limnic	aquatic	microbial eukaryotes, diatoms, cyanobacteria	120	anthropogenic	temperate	PowerSoil® DNA Isolation Kit (QIAGEN)	0.25-0.5	metabarcoding	18S rRNA, 16S rRNA, rbcL	260-470
2020	Keck et al. 2020	Assessing the response of micro-eukaryotic diversity to the Great Acceleration using lake sedimentary DNA	x	Nature Communications	11	1	1-8	10.1038/s41467-020-17682-8	Ecology	past and present	limnic	aquatic	microbial eukaryotes	100	human activities, climate	temperate	Nucleospin® Soil Kit (Macherey-Nagel)	0.5	metabarcoding	18S rRNA	260
2020	Konkel et al. 2020	Blooms of Toxic Cyanobacterium Nodularia spumigena in Norwegian Fjords During HoloceneWarm Periods	x	Toxins	12	4	1-12	10.3390/toxins12040257	Ecology	past	marine	aquatic	cyanobacteria	10000	climate	boreal/subarctic	FastDNA® Spin Kit for soil (MP biomedicals)	0.5	metabarcoding	16S rRNA, cpcBA-IGS, cyE/ndaF	na
2020	Kuwae et al. 2020	Sedimentary DNA tracks decadal-centennial changes in fish abundance	x	Communications Biology	3	558	1-12	10.1038/s42003-020-01282-9	Ecology	past	marine	aquatic	fish	300	na	temperate	PowerSoil® DNA Isolation Kit (QIAGEN)	3	qPCR	na	na
2020	Liu et al. 2020	Holocene vegetation and plant diversity changes in the north- eastern Siberian treeline region from pollen and sedimentary ancient DNA	x	Frontiers in Ecology and Evolution	8	304	1-17	10.3389/fevo.2020.560243	Ecology	past	limnic	terrestrial	plants	7600	na	arctic	PowerMax® Soil DNA Isolation Kit (QIAGEN)	2-4	metabarcoding	trnL	10-146
2020	Møller et al. 2020	Microbial Community Structure in Arctic Lake Sediments Reflect Variations in Holocene Climate Conditions	x	Frontiers in Microbiology	11	1520	1-13	10.3389/fmicb.2020.01520	Ecology	past	limnic	aquatic	bacteria	10 000	climate	subarctic	FastDNA® Spin Kit for soil (MP biomedicals)	0.5	metabarcoding	16S rRNA	290
2020	Pawłowska et al. 2020a	Multiproxy evidence of the Neoglacial expansion of Atlantic Water to eastern Svalbard	x	Climate of the Past	16	1	487-501	10.5194/cp-16-487-2020	Ecology	past	marine	aquatic	foraminifera, diatoms	4000	climate	arctic	PowerMax® Soil DNA Isolation Kit (QIAGEN)	10	metabarcoding	18S rRNA	na
2020	Pawłowska et al. 2020b	Dataset of foraminiferal sedimentary DNA (sedDNA) sequences from Svalbard	x	Data in Brief	30	105553	1-6	10.1016/j.dib.2020.105553	Ecology	past	marine	aquatic	foraminifera	4000	climate	arctic	PowerMax® Soil DNA Isolation Kit (QIAGEN)	0.25	metabarcoding	18S rRNA	na
2020	Pawłowska et al. 2020c	Planktonic foraminifera genomic variations reflect paleoceanographic changes in the Arctic: evidence from sedimentary ancient DNA	x	Scientific Reports	10	15102	1-10	10.1038/s41598-020-72146-9	Ecology	past	marine	aquatic	foraminifera (Neogloboquadrina pachyderma)	140000	climate	arctic	PowerMax® Soil DNA Isolation Kit (QIAGEN)	10	metabarcoding	18S rRNA	na
2020	Sakata et al. 2020	Sedimentary eDNA provides different information on timescale and fish species composition compared with aqueous eDNA	x	Environmental DNA	2	4	505-518	10.1002/edn3.75	Methodology	past	limnic	aquatic	fish	recent	na	na	PowerSoil® DNA Isolation Kit (QIAGEN)	3	qPCR	cytB	370
2020	Stoof-Leichsenring et al. 2020b	Lake-depth related pattern of genetic and morphological diatom diversity in boreal Lake Bolshoe Toko, Eastern Siberia	x	PLoS ONE	15	4	e0230284	10.1371/journal.pone.0230284	Ecology	past	limnic	aquatic	diatoms	recent	na	na	PowerSoil® DNA Isolation Kit (QIAGEN)	na	metabarcoding	rbcL	76
2020	Stoof-Leichsenring et al. 2020a	Phylogenetic diversity and environment form assembly rules for Arctic diatom genera—A study on recent and ancient sedimentary DNA	x	Journal of Biogeography	47	5	1166-1179	10.1111/jbi.13786	Ecology	past	limnic	aquatic	diatoms	7000	climate	arctic	PowerMax® Soil DNA Isolation Kit (QIAGEN)	2-10	metabarcoding	trnL	76
2020	Tabares et al. 2020	Vegetation state changes in the course of shrub encroachment in an African savanna since about 1850 CE and their potential drivers	x	Ecology and Evolution	10	2	962-979	10.1002/ece3.5955	Ecology	past	limnic	terrestrial	plants	170	climate	semiarid	PowerMax® Soil DNA Isolation Kit (QIAGEN)	5	metabarcoding	trnL	na
2020	Thomas et al. 2020	Weak Influence of Paleoenvironmental Conditions on the Subsurface Biosphere of Lake Ohrid over the Last 515 ka	x	Microorganisms	8	11	1736	10.3390/microorganisms8111736	Ecology	past and present	limnic	aquatic	bacteria	515000	na	temperate	PowerSoil® DNA Isolation Kit (QIAGEN)	na	metabarcoding	16S rRNA	290
2020	Voldstad et al. 2020	A complete Holocene lake sediment ancient DNA record reveals long-standing high Arctic plant diversity hotspot in northern Svalbard	x	Quaternary Science Reviews	234	1	1-15	10.1016/j.quascirev.2020.106207	Ecology	past	limnic	terrestrial and aquatic	plants	12000	climate	arctic	PowerMax® Soil DNA Isolation Kit (QIAGEN)	2-5	metabarcoding	trnL	na
2020	Weisbrod et al. 2020	Is a Central Sediment Sample Sufficient? Exploring Spatial and Temporal Microbial Diversity in a Small Lake	x	Toxins	12	580	1-17	10.3390/toxins12090580	Ecology	present	limnic	aquatic	bacteria, cyanobacteria	surface sediments	spatial variability	temperate	PowerSoil® DNA Isolation Kit (QIAGEN)	0.2-0.4	metabarcoding, ddPCR	16S rRNA, mcyE	na
2020	Yan et al. 2020	Warming favors subtropical lake cyanobacterial biomass increasing	x	Science of the Total Environment	726	na	1-7	10.1016/j.scitotenv.2020.138606	Ecology	past	limnic	aquatic	cyanobacteria	1200	climate	subtropical	FastDNA® Spin Kit for soil (MP biomedicals)	0.5	metabarcoding	16S rRNA	291
2020	Zimmermann et al. 2020a	Changes in the composition of marine and sea-ice diatoms derived from sedimentary ancient DNA of the eastern Fram Strait over the past 30 000 years	x	Ocean Science	16	5	1017-1032	10.5194/os-16-1017-2020	Ecology	past	marine	aquatic	diatoms	30000	climate	arctic	PowerMax® Soil DNA Isolation Kit (QIAGEN)	2	metabarcoding	rbcL	76
2020	Zimmermann et al. 2020b	Sedimentary ancient DNA from Kronotsky Peninsula: how sea ice, salinity and insolation dynamics have shaped diatom composition and richness over the past 20,000 years	x	Paleoceanography and Paleoclimatology	na	na	na	10.1002/essoar.10504202.1	Ecology	past	marine	aquatic	diatoms	19900	climate	subarctic	PowerMax® Soil DNA Isolation Kit (QIAGEN)	2-4	metabarcoding	rbcL	na
2019	Belle & Parent 2019	Reconstruction of Past Dynamics of Methane-Oxidizing Bacteria in Lake Sediments Using a Quantitative PCR Method: Connecting Past Environmental Changes and Microbial Community	x	Geomicrobiology Journal	36	6	570-579	10.1080/01490451.2019.1583698	Ecology	past	limnic	aquatic	methane-oxiding bacteria	1200	salinity, organic matter, climate	temperate	PowerSoil® DNA Isolation Kit (QIAGEN)	0.3	qPCR	16S rRNA	110 -200
2019	Capo et al. 2019	How Does Environmental Inter-annual Variability Shape Aquatic Microbial Communities? A 40-Year Annual Record of Sedimentary DNA From a Boreal Lake (Nylandssjön, Sweden)	x	Frontiers in Ecology and Evolution	7	245	1-13	10.3389/fevo.2019.00245	Ecology	past	limnic	aquatic	protists, cyanobacteria	40	weather, terrestrial matter	boreal	Nucleospin® Soil Kit (Macherey-Nagel)	0.5	metabarcoding, qPCR	18S rRNA, 16S rRNA-ITS	260 bp
2019	Clarke et al. 2019a	Holocene floristic diversity and richness in northeast Norway revealed by sedimentary ancient DNA (sedaDNA) and pollen	x	Boreas	48	2	299-316	10.1111/bor.12357	Ecology	past	limnic	terrestrial and aquatic	plants	10700	climate	northern boreal	PowerMax® Soil DNA Isolation Kit (QIAGEN)	10	metabarcoding	trnL	76
2019	Clarke et al. 2019b	Persistence of arctic-alpine flora during 24,000 years of environmental change in the Polar Urals	x	Scientific Report	9	19613	1-11	10.1038/s41598-019-55989-9	Ecology	past	limnic	terrestrial	plants	24000	climate	arctic-alpine	PowerMax® Soil DNA Isolation Kit (QIAGEN)	10	metabarcoding	trnL	76
2019	Crump et al. 2019	Arctic shrub colonization lagged peak postglacial warmth: Molecular evidence in lake sediment from Arctic Canada	x	Global Change Biology	25	12	4244-4256	10.1111/gcb.14836	Ecology	past	limnic	terrestrial	plants	7400	climate	arctic	Custom protocol	1	metabarcoding	trnL	76
2019	De Schepper et al. 2019	The potential of sedimentary ancient DNA for reconstructing past sea ice evolution	x	The ISME Journal	13	10	2566-2577	10.1038/s41396-019-0457-1	Ecology	past	marine	aquatic	eukaryotes	100000	climate	arctic	DNeasy PowerSoil mini Kit (QIAGEN)	0.5	metabarcoding, ddPCR	18S rRNA, ITS1	na
2019	Gascés-Pastor et al. 2019	DNA metabarcoding reveals modern and past eukaryotic communities in a high-mountain peat bog system	x	Journal of Paleolimnology	62	4	425-441	10.1007/s10933-019-00097-x	Ecology	past and present	peat bog	aquatic	eukaryotes	10000	na	alpine	Soil DNA Isolation Plus Kit (Norgen)	0.3	metabarcoding	18S rRNA, COI	150
2019	Giguet-Covex et al. 2019	New insights on lake sediment DNA from the catchment: importance of taphonomic and analytical issues on the record quality	x	Scientific Reports	9	14676	1-21	10.1038/s41598-019-50339-1	Geology	past	limnic	terrestrial	plants, animals	6500	cacthment geology	temperate	Taberlet12 protocol	na	metabarcoding	trnL, MamP007	76, 60-84
2019	Gomez Cabrera et al. 2019	Broadening the taxonomic scope of coral reef palaeoecological studies using ancient DNA	x	Molecular Ecology	28	10	2636-2652	10.1111/mec.15038	Ecology	past	marine	aquatic	eukaryotes	750	na	tropical	PowerLyzer DNA Isolation Kit (MOBIO)	1	metabarcoding	18S rRNA	200
2019	Lammers et al. 2019	Clitellate worms (Annelida) in lateglacial and Holocene sedimentary DNA records from the Polar Urals and northern Norway	x	Boreas	48	2	317-329	10.1111/bor.12363	Ecology	past	limnic	terrestrial and aquatic	worms	24000	na	arctic	PowerMax® Soil DNA Isolation Kit (QIAGEN)	6-11	metabarcoding	trnL, 16S rRNA	76, 60-84
2019	Legrand et al. 2019	Akinetes and ancient DNA reveal toxic cyanobacterial recurrences and their potential for resurrection in a 6700-year-old core from a eutrophic lake	x	Science of the Total Environment	687	1	1369-1380	10.1016/j.scitotenv.2019.07.100	Ecology	past	limnic	aquatic	cyanobacteria	6700	na	temperate	FastDNA® Spin Kit for soil (MP biomedicals)	na	nested PCR	16S rRNA	na
2019	Li et al. 2019	Sedimentary DNA reveals over 150 years of ecosystem change by human activities in Lake Chao, China	x	Environmental International	133	2	1-10	10.1016/j.envint.2019.105214	Ecology	past	limnic	aquatic	bacteria, eukaryotes	150	human activities	temperate	PowerSoil® DNA Isolation Kit (QIAGEN)	0.5	metabarcoding	18S rRNA 16S rRNA	130, 180
2019	Monchamp et al. 2019a	High dispersal levels and lake warming are emergent drivers of cyanobacterial community assembly in peri-Alpine lakes	x	Scientific Reports	9	7366	1-8	10.1038/s41598-019-43814-2	Ecology	past	limnic	aquatic	cyanobacteria	100	Geographic distance, environmental distance (nutrients and temperature)	temperate	PowerSoil® DNA Isolation Kit (QIAGEN)	na	metabarcoding	16S rRNA	400
2019	Monchamp et al. 2019b	Long Term Diversity and Distribution of Non-photosynthetic Cyanobacteria in Peri-Alpine Lakes	x	Frontiers in Microbiology	9	3344	1-11	10.3389/FMICB.2018.03344	Ecology	past	limnic	aquatic	cyanobacteria	100	Geographic distance	temperate	PowerSoil® DNA Isolation Kit (QIAGEN)	na		16S rRNA	400
2019	More et al. 2019	Holocene paleodepositional changes reflected in the sedimentary microbiome of the Black Sea	x	Geobiology	17	4	436-448	10.1111/gbi.12338	Ecology	past	marine	aquatic	bacteria, archaea	13550	Postglacial marine reconnection	temperate	Custom protocol	8-10	metagenomics	na	na
2019	Nelson-Chorney et al. 2019	Environmental DNA in lake sediment reveals biogeography of native genetic diversity	x	Frontiers in Ecology and the Environment	17	6	313-318	10.1002/fee.2073	Ecology	past	limnic	aquatic	fishs	100	human-mediated introduction	arctic	PowerSoil® DNA Isolation Kit (QIAGEN)	0.1-0.2	metabarcoding	na	na
2019	Parducci et al. 2019	Shotgun Environmental DNA, Pollen, and Macrofossil Analysis of Lateglacial Lake Sediments From Southern Sweden	x	Frontiers in Ecology and Evolution	7	189	1-15	10.3389/fevo.2019.00189	Ecology	past	limnic	terrestrial	plants	14100	climate	boreal	Pedersen2016 protocol	1	metagenomics	na	na
2019	Pilon et al. 2019	Contrasting histories of microcystin-producing cyanobacteria in two temperate lakes as inferred from quantitative sediment DNA analyses	x	Lake and Reservoir Management	35	1	102-117	10.1080/10402381.2018.1549625	Ecology	past	limnic	aquatic	cyanobacteria	175	na	temperate	PowerSoil® DNA Isolation Kit (QIAGEN)	0.25-0.35	qPCR	mcyD	107
2019	Ruuskanen et al. 2019	Swift evolutionary response of microbes to a rise in anthropogenic mercury in the Northern Hemisphere	x	The ISME Journal	14	3	788-800	10.1038/s41396-019-0563-0	Ecology	past	limnic	aquatic	bacteria, archaea	300	human activities	arctic, subarctic	PowerSoil® DNA Isolation Kit (QIAGEN)	0.25	metabarcoding, ddPCR	merA	na
2019	Thomas & Ariztegui 2019	Fluid inclusions from the deep Dead Sea sediment provide new insights on Holocene extreme microbial life	x	Quaternary Science Reviews	212	1	18-27	10.1016/j.quascirev.2019.03.020	Ecology	past	hypersaline	aquatic	bacteria, archaea	12500	salinity, lake status	arid	Custom protocol	na	metabarcoding	16S rRNA	na
2019	Vuillemin et al. 2019	Archaea dominate oxic subseafloor communities over multimillion-year time scales	x	Science Advances	5	6	1-11	10.1126/sciadv.aaw4108	Ecology	past and present	marine	aquatic	archaea	15000000	na	na	Custom protocol	10	metagenomics	na	na
2019	Yan et al. 2019	Responses of cyanobacteria to climate and human activities at Lake Chenghai over the past 100 years	x	Ecological Indicators	104	1	755-763	10.1016/j.ecolind.2019.03.019	Ecology	past	limnic	aquatic	cyanobacteria	100	climate, human activities	na	E.Z.N.A.® Water DNA Kit (Omega Bio-tek)	0.5	metabarcoding	16SS rRNA, 23S rRNA	290, 410
2018	Ahmed et al. 2018	Archaeal community changes in Lateglacial lake sediments: Evidence from ancient DNA	x	Quaternary Science Reviews	181	1	19-29	10.1016/j.quascirev.2017.11.037	Ecology	past	limnic	aquatic	archaea	14100	nutrient limitation	abyssal	Pedersen2016 protocol	1	metagenomics	na	na
2018	Alsos et al. 2018	Plant DNA metabarcoding of lake sediments: How does it represent the contemporary vegetation	x	PLoS ONE	13	4	1-23	10.1371/journal.pone.0195403	Methodology	past and present	limnic	terrestrial and aquatic	plants	recent	catchment vegetation	boreal	PowerMax® Soil DNA Isolation Kit (QIAGEN)	4-10	metabarcoding	trnL	50
2018	Epp et al. 2018	Temporal and spatial patterns of mitochondrial haplotype and species distributions in Siberian larches inferred from ancient environmental DNA and modeling	x	Scientific Reports	8	17436	1-9	10.1038/s41598-018-35550-w	Ecology	past	limnic	terrestrial	plants	9000	na	boreal	na	na	metabarcoding	trnL	76
2018	Ficetola et al. 2018	DNA from lake sediments reveals long-term ecosystem changes after a biological invasion	x	Science Advances	4	5	1-9	10.1126/sciadv.aar4292	Ecology	past	limnic	terrestrial	rabbits	600	biological invasion	arctic	Custom protocol	15	metabarcoding	16S, tnrl	60-84, 65-155
2018	Giosan et al. 2018	Neoglacial climate anomalies and the Harappan metamorphosis	x	Climate of the Past	14	1	1669-1686	10.5194/cp-14-1669-2018	Ecology	past	coastal marine	aquatic	eukaryotes	13500	cacthment geology-human development	temperate	Custom protocol	5	metabarcoding	18S rRNA	130
2018	Harrison et al. 2018	Abrupt burial imparts persistent changes to the bacterial diversity of turbidite-associated sediment profiles	x	Geobiology	16	2	190-202	10.1111/gbi.12271	Ecology	past	fresh/marine	aquatic	bacteria, archaea	ca. 50	geological disturbance (gravity events)	temperate	PowerSoil® DNA Isolation Kit (QIAGEN)	0.1-1	metabarcoding	16S rRNA	na
2018	Kisand et al. 2018	From microbial eukaryotes to metazoan vertebrates: Wide spectrum paleo-diversity in sedimentary ancient DNA over the last ~14,500 years	x	Geobiology	16	6	628-639	10.1111/gbi.12307	Ecology	past	limnic	both	eukaryotes	14500	na	temperate	PowerSoil® DNA Isolation Kit (QIAGEN)	0.2-0.3	metabarcoding	18S rRNA	300-450
2018	Marshall et al. 2018	Metagenomes from deep Baltic Sea sediments reveal how past and present environmental conditions determine microbial community composition	x	Marine Genomics	37	1	58-68	10.1016/j.margen.2017.08	Ecology	past and present	limnic, marine	aquatic	bacteria, archaea, eukaryotes	9000	na	na	FastDNA® Spin Kit for soil (MP biomedicals)	na	metagenomics	na	na
2018	Monchamp et al. 2018	Homogenization of lake cyanobacterial communities over a century of climate change and eutrophication	x	Nature Ecology and Evolution	2	2	317-324	10.1038/s41559-017-0407-0	Ecology	past	limnic	aquatic	cyanobacteria	100	climate, eutrophication	temperate	PowerSoil® DNA Isolation Kit (QIAGEN)	na	metabarcoding	16S rRNA	400
2018	More et al. 2018	A 43 kyr record of protist communities and their response to oxygen minimum zone variability in the Northeastern Arabian Sea	x	Earth and Planetary Science Letters	496	1	248-256	10.1016/j.epsl.2018.05.045	Ecology	past	marine	aquatic	protists	43000	Monsoon-regulated oxygen minimum zone expansion	subtropical	Custom protocol	5-10	metabarcoding	18S rRNA	130
2018	Olajos et al. 2018	Estimating species colonization dates using DNA in lake sediment	x	Methods in Ecology and Evolution	9	3	535-543	10.1111/2041-210X.12890	Ecology	past	limnic	aquatic	fishs	10000	na	boreal	PowerSoil® DNA Isolation Kit (QIAGEN)	0.25	PCR	mitochondrial genes	na
2018	Stivrins et al 2018	Towards understanding the abundance of non-pollen palynomorphs: A comparison of fossil algae, algal pigments and sedaDNA from temperate lake sediments	x	Review of Paleobotany and Palynology	249	1	9-15	10.1016/j.revpalbo.2017.11.001	Methodology	past	limnic	both	eukaryotic phytoplankton	14500	climate	temperate	PowerSoil® DNA Isolation Kit (QIAGEN)	0.3	metabarcoding	18S rRNA	450-460
2018	Torti et al. 2018	Preservation of microbial DNA in marine sediments: insights from extracellular DNA pools	x	Environmental Microbiology	20	12	4526-4542	10.1111/1462-2920.14401	Methodology	past and present	marine	aquatic	bacteria & archaea	9000	na	temperate	Custom protocol	0.2	metabarcoding, qPCR	16S rRNA	300
2018	Tse et al. 2018	Combining High-Throughput Sequencing of sedaDNA and Traditional Paleolimnological Techniques To Infer Historical Trends in Cyanobacterial Communities	x	Environmental Science & Technology	52	12	6842-6853	10.1021/acs.est.7b06386	Ecology	past	limnic	aquatic	cyanobacteria	40	na	na	E.Z.N.A.® Water DNA Kit (Omega Bio-tek)	1	metabarcoding	16S rRNA	379
2018	Vuillemin et al. 2018a	Microbial community composition along a 50 000-year lacustrine sediment sequence	x	FEMS Microbiology Ecology	94	4	1-14	10.1093/femsec/fiy029	Ecology	past and present	limnic	aquatic	bacteria & archaea	50000	salinity, organic matter, depositional conditions	peri-glacial	PowerSoil® DNA Isolation Kit (QIAGEN)	1	metabarcoding	16S rRNA	na
2018	Vuillemin et al. 2018b	Metabolic potential of microbial communities from ferruginous sediments	x	Environmental Microbiology	20	12	4297-4313	10.1111/1462-2920.14343	Ecology	past and present	limnic	aquatic	bacteria & archaea	4,000	geochemistry, iron content	tropical	Alawi2014 protocol	1	metabarcoding, metagenomics, qPCR	16S rRNA	291
2017	Bremond et al. 2017	Five thousand years of tropical lake sediment DNA records from Benin	x	Quaternary Science Reviews	170	1	203-211	10.1016/j.quascirev.2017.06.025	Ecology	past	limnic	terrestrial	plants	5000	na	tropical	Taberlet2012 protocol	15	metabarcoding	trnL	76
2017	Capo et al. 2017a	Tracking a century of changes in microbial eukaryotic diversity in lakes driven by nutrient enrichment and climate warming	x	Environmental Microbiology	19	7	2873-2892	10.1111/1462-2920.13815	Ecology	past	limnic	aquatic	protists	100	climate, eutrophication	temperate	Nucleospin® Soil Kit (Macherey-Nagel)	0.75	metabarcoding	18S rRNA	260 bp
2017	Capo et al. 2017b	To what extent is the DNA of microbial eukaryotes modified during burying into lake sediments? A repeat-coring approach on annually laminated sediments	x	Journal of Paleolimnology	58	4	479-495	10.1007/s10933-017-0005-9	Methodology	past	limnic	aquatic	protists	40	na	boreal	Nucleospin® Soil Kit (Macherey-Nagel)	0.75	metabarcoding	18S rRNA	260 bp
2017	Dulias et al. 2017	Sedimentary DNA versus morphology in the analysis of diatom-environment relationships	x	Journal of Paleolimnology	57	1	51-66	10.1007/s10933-016-9926-y	Ecology	past	limnic	aquatic	diatoms	surface sediments	vegetation, water hydrochemistry	arctic, boreal	PowerMax® Soil DNA Isolation Kit (QIAGEN)	5	metabarcoding	trnL	76
2017	Han et al. 2017	Inference on Paleoclimate Change Using Microbial Habitat Preference in Arctic Holocene Sediments	x	Scientific Reports	7	9652	1-11	10.1038/s41598-017-08757-6	Ecology	past and present	marine	aquatic	bacteria, archaea	11000	climate, oceanography	polar	PowerSoil® DNA Isolation Kit (QIAGEN)	0.25	metabarcoding, qPCR	16S rRNA	na
2017	Heinecke et al. 2017	Aquatic macrophyte dynamics in Lake Karakul (Eastern Pamir) over the last 29 cal ka revealed by sedimentary ancient DNA and geochemical analyses of macrofossil remains	x	Journal of Paleolimnology	58	3	403-417	10.1007/s10933-017-9986-7	Ecology	past	limnic	aquatic	hydrophytes	29000	lake level	alpine	PowerMax® Soil DNA Isolation Kit (QIAGEN)	5	metabarcoding	trnL	76
2017	Kouduka et al. 2017	Eukaryotic diversity in late Pleistocene marine sediments around a shallow methane hydrate deposit in the Japan Sea	x	Geology	15	5	715-727	10.1111/gbi.12233	Ecology	past	marine	aquatic	eukaryotes	97000	na	na	Custom protocol	0.1	metabarcoding, qPCR	18S rRNA	186
2017	Monchamp et al. 2017	Sedimentary and egg-bank DNA from 3 European lakes reveal concurrent changes in the composition and diversity of cyanobacterial and Daphnia communities	x	Hydrobiologia	800	1	155-172	10.1007/s10750-017-3247-7	Ecology	past	limnic	aquatic	cyanobacteria, Daphnia	100	eutrophication	temperate	PowerSoil® DNA Isolation Kit (QIAGEN)	na	metabarcoding	16S rRNA	400
2017	Morard et al. 2017	Planktonic foraminifera-derived environmental DNA extracted from abyssal sediments preserves patterns of plankton macroecology	x	Biogeosciences	14	11	2741-2754	10.5194/bg-14-2741-2017	Methodology	past	marine	aquatic	foraminifera	surface sediments	na	na	na	na	metabarcoding	18S rRNA	na
2017	Niemeyer et al. 2017	A comparison of sedimentary DNA and pollen from lake sediments in recording vegetation composition at the Siberian treeline	x	Molecular Ecology Resources	17	6	46-62	10.1111/1755-0998.12689	Methodology	past	limnic	terrestrial	plants	surface sediments	na	arctic	PowerMax® Soil DNA Isolation Kit (QIAGEN)	8	metabarcoding	trnL	76
2017	Orsi et al. 2017	Climate oscillations reflected within the microbiome of Arabian Sea sediments	x	Scientific Reports	7	6040	1-12	10.1038/s41598-017-05590-9	Ecology	past	marine	aquatic	bacteria, archaea	43000	Monsoon-regulated oxygen minimum zone expansion	na	Custom protocol	5	metagenomics, qPCR	16S rRNA	na
2017	Sabatier et al. 2017	6-kyr record of flood frequency and intensity in the western Mediterranean Alps - Interplay of solar and temperature forcing	x	Quaternary Science Reviews	170	1	121-135	10.1016/j.quascirev.2017.06.019	Ecology	past	limnic	terrestrial	mammals	6000	solar, temperature	temperate	Custom protocol	15	metabarcoding	16S rRNA	60-84
2017	Sjögren et al. 2017	Lake sedimentary DNA accurately records 20th Century introductions of exotic conifers in Scotland	x	New Phytologist	213	2	929-941	10.1111/nph.14199	Ecology	past	limnic	terrestrial	plants	100	forestry	temperate	PowerMax® Soil DNA Isolation Kit (QIAGEN)	5-8	metabarcoding	trnL	76
2017	Vuillemin et al. . 2017	Preservation and significance of extracellular DNA in ferruginous sediments from Lake Towuti, Indonesia.	x	Frontiers in Microbiology	8	1440	1-15	10.3389/fmicb.2017.01440	Ecology	past and present	limnic	aquatic	bacteria, archaea	3-4000	geochemistry, iron content	tropical	Alawi2014 protocol	1	metabarcoding	16S rRNA	na
2017	Wang et al. 2017	The southern coastal Beringian land bridge: cryptic refugium or pseudorefugium for woody plants during the Last Glacial Maximum?	x	Journal of Biogeography	44	7	1559-1571	10.1111/jbi.13010	Ecology	past	limnic	terrestrial	plants	18000	climate	arctic	Custom protocol	na	metagenomics	na	na
2017	Wurzbacher et al. 2017	Shifts among Eukaryota, Bacteria, and Archaea define the vertical organization of a lake sediment	x	Microbiome	5	41	1-16	10.1186/s40168-017-0255-9	Ecology	past and present	limnic	aquatic	bacteria, archaea, eukaryotes	150	environmental parameters, time	temperate	UltraClean® Soil DNA Kit (QIAGEN)	0-2-0.4	metabarcoding	16S and 18S rRNA	na
2017	Zimmerman et al. 2017a	Sedimentary ancient DNA and pollen reveal the composition of plant organic matter in Late Quaternary permafrost sediments of the Buor Khaya Peninsula (north-eastern Siberia)	x	Biogeosciences	14	3	575-596	10.5194/bg-14-575-2017	Ecology	past	limnic	terrestrial	plants	54000	climate	subarctic	PowerMax® Soil DNA Isolation Kit (QIAGEN)	5	metabarcoding	trnL	76
2017	Zimmerman et al. 2017b	The History of Tree and Shrub Taxa on Bol'shoy Lyakhovsky Island (New Siberian Archipelago) since the Last Interglacial Uncovered by Sedimentary Ancient DNA and Pollen Data	x	Genes	8	273	1-28	10.3390/genes8100273	Ecology	past	limnic	terrestrial	plants	58300	climate	arctic	PowerMax® Soil DNA Isolation Kit (QIAGEN)	5	metabarcoding	trnL	76
2016	Alsos et al. 2016	Sedimentary ancient DNA from Lake Skartjørna, Svalbard: Assessing the resilience of arctic flora to Holocene climate change	x	The Holocene	26	4	627-642	10.1177/0959683615612563	Ecology	past	limnic	terrestrial	plants	8500	climate	arctic	PowerMax® Soil DNA Isolation Kit (QIAGEN)	6-11	metabarcoding	trnL	50
2016	Belle et al. 2016	20th century human pressures drive reductions in deepwater oxygen leading to losses of benthic methane-based food webs	x	Quaternary Science Reviews	137	1	209-220	10.1016/j.quascirev.2016.02.019	Ecology	past	limnic	aquatic	methanotrophic bacteria	1500	na	temperate	PowerSoil® DNA Isolation Kit (QIAGEN)	0.3	qPCR	16S rRNA	110 -200
2016	Capo et al. 2016	Long-term dynamics in microbial eukaryotes communities: a palaeolimnological view based on sedimentary DNA	x	Molecular Ecology	25	23	5925-5943	10.1111/mec.13893	Ecology	past	limnic	aquatic	microbial eukaryotes	2000	climate, nutrients	temperate, polar	Nucleospin® Soil Kit (Macherey-Nagel)	0.25	metabarcoding	18S rRNA	260 bp
2016	Graham et al 2016	Timing and causes of mid-Holocene mammoth extinction on St. Paul Island, Alaska	x	Proceedings of the National Academy of Sciences of the United States of America	113	33	9310-9314	10.1073/pnas.1604903113	Ecology	past	limnic	terrestrial	mammoth	11000	climate	arctic	Extraction methods comparison	0.25	PCR, shotgun sequencing	d-loop, 16S rRNA	na
2016	Kirkpatrick et al. 2016	Fossil DNA persistence and decay in marine sediment over hundred-thousand-year to million-year time scales	x	Geology	44	8	615-618	10.1130/G37933.1	Methodology	past	marine	aquatic	bacteria, eukaryotes	1400000	na	na	na	0.25	metabarcoding	16S rRNA	na
2016	Klouch et al. 2016	Historical records from dated sediment cores reveal the multidecadal dynamic of the toxic dinoflagellate Alexandrium minutum in the Bay of Brest (France)	x	FEMS Microbiology Ecology	92	2	1-16	10.1093/femsec/fiw101	Ecology	past	marine	aquatic	dinoflagellates	150	na	na	PowerMax® Soil DNA Isolation Kit (QIAGEN)	5-7	qPCR, cloning-sequencing	ITS	na
2016	Li et al. 2016	Temporal Succession of Ancient Phytoplankton Community in Qinghai Lake and Implication for Paleo-environmental Change	x	Scientific Reports	6	19769	1-12	10.1038/srep19769	Ecology	past	limnic	aquatic	phytoplankton	18500	climate	polar	FastDNA® Spin Kit for soil (MP biomedicals)	0.5	PCR-DGGE	23S rRNA	na
2016	Monchamp et al. 2016	Sedimentary DNA Reveals Cyanobacterial Community Diversity over 200 Years in Two Perialpine Lakes	x	Applied and Environmental Microbiology	82	21	6472-6482	10.1128/AEM.02174-16	Ecology	past	limnic	aquatic	cyanobacteria	200	climate, eutrophication	temperate	PowerSoil® DNA Isolation Kit (QIAGEN)	na	metabarcoding	16S rRNA	400
2016	Pedersen et al. 2016	Postglacial viability and colonization in North America’s ice-free corridor	x	Nature	357	7618	45-49	10.1038/nature19085	Ecology	past	limnic	terrestrial	plants, mammals	15000	climate	subarctic	Pedersen2016 protocol	2	metagenomics	na	na
2016	Szczuciński et al. 2016	Ancient sedimentary DNA reveals past tsunami deposits	x	Marine Geology	381	1	29-33	10.1016/j.margeo.2016.08.006	Geology	past	marine	aquatic	foraminifera	2000	tsunami	temperate	PowerMax® Soil DNA Isolation Kit (QIAGEN)	5	metabarcoding	SSU gene	68-196
2016	Vuillemin et al. 2016a	Recording of climate and diagenesis through sedimentary DNA and fossil pigments at Laguna Potrok Aike, Argentina	x	Biogeosciences	13	8	2475-2492	10.5194/bg-13-2475-2016	Ecology	past	limnic	aquatic	bacteria & archaea	20'000	salinity, organic matter, depositional conditions	peri-glacial	PowerSoil® DNA Isolation Kit (QIAGEN)	na	Sanger sequencing	16S rRNA	na
2016	Vuillemin et al. 2016b	Geomicrobiological Features of Ferruginous Sediments from Lake Towuti, Indonesia	x	Frontiers in Microbiology	7	1007	1-16	10.3389/fmicb.2016.01007	Ecology	past and present	limnic	aquatic	bacteria & archaea	ca.3-4000	geochemistry, iron content	tropical	Alawi2014 protocol	1	PCR-DGGE	16S rRNA	na
2015	Belle et al. 2015	A case study of the past CH4 cycle in lakes by the combined use of dual isotopes (carbon and hydrogen) and ancient DNA of methane-oxidizing bacteria: rearing experiment and application to Lake Remoray (eastern France)	x	Aquatic Ecology	49	3	279-291	10.1007/s10452-015-9523-6	Ecology	past	limnic	aquatic	methanotrophic bacteria	1500	na	temperate	PowerSoil® DNA Isolation Kit (QIAGEN)	0.3	qPCR	16S rRNA	na
2015	Capo et al. 2015	Is Planktonic Diversity Well Recorded in Sedimentary DNA? Toward the Reconstruction of Past Protistan Diversity	x	Microbial Ecology	70	4	865-875	10.1007/s00248-015-0627-2	Methodology	past	limnic	aquatic	microbial eukaryotes	60	na	temperate	UltraClean® Soil DNA Kit (QIAGEN)	1	metabarcoding	18s rRNA	350
2015	Epp et al. 2015	Lake sediment multi-taxon DNA from North Greenland records early post-glacial appearance of vascular plants and accurately tracks environmental changes	x	Quaternary Science Reviews	117	1	152-163	10.1016/j.quascirev.2015.03.027	Ecology	past	limnic	both	plants, copepods, diatoms	10000	climate, salinity	polar	PowerMax® Soil DNA Isolation Kit (QIAGEN)	na	metabarcoding	tnrL, rbcL, 28S rRNA	na
2015	Etienne et al. 2015	Two thousand-year reconstruction of livestock production intensity in France using sediment-archived fecal Bacteroidales and source-specific mitochondrial markers	x	The Holocene	25	9	1384-1393	10.1177/0959683615585836	Ecology	past	limnic	terrestrial	animals	2000	na	temperate	Nucleospin® Soil Kit (Macherey-Nagel)	0.5	cloning-sequencing, qPCR	mtDNA, 16S rRNA	na
2015	Kyle et al. 2015a	Amplification of DNA in sediment cores to detect historic Planktothrix occurrence in three Norwegian lakes	x	Journal of Paleolimnology	53	1	61-72	10.1007/s10933-014-9807-1	Methodology	past	limnic	aquatic	cyanobacteria (Planktothrix sp.)	300	na	boreal	PowerSoil® DNA Isolation Kit (QIAGEN)	na	qPCR	ociB	na
2015	Kyle et al. 2015b	The Red Queen Race between Parasitic Chytrids and Their Host, Planktothrix: A Test Using a Time Series Reconstructed from Sediment DNA	x	PLoS ONE	10	3	1-17	10.1371/journal.pone.0118738	Ecology	past	limnic	aquatic	chytrids (Fungi)	30	climate, nutrients	boreal	PowerSoil® DNA Isolation Kit (QIAGEN)	na	qPCR	ociB, ITS	na
2015	Pal et al. 2015	Temporal trends in cyanobacteria revealed through DNA and pigment analyses of temperate lake sediment cores	x	Journal of Paleolimnology	54	1	87-101	10.1007/s10933-015-9839-1	Ecology	past	limnic	aquatic	cyanobacteria	200	climate, land use	temperate	PowerSoil® DNA Isolation Kit (QIAGEN)	0.25	qPCR	16S rRNA	153-156
2015	Pansu et al. 2015	Reconstructing long-term human impacts on plant communities: An ecological approach based on lake sediment DNA	x	Molecular Ecology	24	7	1485-1498	10.1111/mec.13136	Ecology	past	limnic	terrestrial	plants	10000	climate, nutrients	alpine	Nucleospin® Soil Kit (Macherey-Nagel)	15	metabarcoding	trnL	76
2015	Parducci et al. 2015	Proxy comparison in ancient peat sediments: Pollen, macrofossil and plant DNA	x	Philosophical Transactions of the Royal Society B	370	1660	2-9	10.1098/rstb.2013.0382	Methodology	past	limnic	terrestrial	plants	42-52 000	na	subarctic	PowerMax® Soil DNA Isolation Kit (QIAGEN)	2	metabarcoding	trnL	76
2015	Pedersen et al. 2015	A comparative study of ancient environmental DNA to pollen and macrofossils from lake sediments reveals taxonomic overlap and additional plant taxa	x	Quaternary Science Reviews	75	1	161-168	10.1016/j.quascirev.2013.06.006	Ecology	past	limnic	terrestrial	plants	10000	na	subarctic	PowerMax® Soil DNA Isolation Kit (QIAGEN)	na	metabarcoding	trnL	76
2015	Poulain et al. 2015	Microbial DNA records historical delivery of anthropogenic mercury	x	The ISME Journal	9	12	2541-2550	10.1038/ismej.2015.86	Ecology	past	limnic	aquatic	bacteria	200	mercury cycling	subarctic	PowerSoil® DNA Isolation Kit (QIAGEN)	0.25	cloning-sequencing	merA, rpoB	1200, 640
2015	Savichtcheva et al. 2015	Effects of nutrients and warming on Planktothrix dynamics and diversity: a palaeolimnological view based on sedimentary DNA and RNA	x	Freshwater Biology	60	1	31-49	10.1111/fwb.12465	Ecology	past	limnic	aquatic	cyanobacteria (incl Planktothrix sp.)	100	climate, nutrients	temperate	UltraClean® Soil DNA Kit (QIAGEN)	1	qPCR	16S rRNA, ITS	275-350
2015	Stoof-Leichsenring et al. 2015	Genetic data from algae sedimentary DNA reflect the influence of environment over geography	x	Scientific Reports	5	12924	1-11	10.1038/srep12924	Ecology	past	limnic	aquatic	diatoms (Staurosira sp.)	7000	climate, geographic distance	arctic-boreal	na	na	cloning-sequencing	trnL	76
2015	Thomas et al. 2015	﻿Impact of paleoclimate on the distribution of microbial communities in the subsurface sediment of the Dead Sea	x	Geobiology	13	6	546-561	10.1111/gbi.12151	Ecology	past and present	hypersaline	aquatic	bacteria, archaea	90000	climate	arid	Phenol-chloroform	0.5	metabarcoding	16S rRNA	na
2015	Yang et al. 2015	Sedimentary archaeal amoA gene abundance reflects historic nutrient level and salinity fluctuations in Qinghai Lake, Tibetan Plateau	x	Scientific Reports	5	18071	1-9	10.1038/srep18071	Ecology	past	limnic	aquatic	archaea	18500	nutrient, salinity	alpine	FastDNA® Spin Kit for soil (MP biomedicals)	0.5	qPCR	16S rRNA, amoA	na
2014	Belle et al. 2014	Temporal changes in the contribution of methane-oxidizing bacteria to the biomass of chironomid larvae determined using stable carbon isotopes and ancient DNA	x	Journal of Paleolimnology	52	1	215-228	10.1007/s10933-014-9789-z	Ecology	past	limnic	aquatic	methanotrophs	~1 500	climate, nutrients	temperate	PowerClean DNA Clean-Up Kit (QIAGEN)	0.3	qPCR	16S rRNA	110 -200
2014	Boessenkool et al. 2014	Use of Ancient Sedimentary DNA as a Novel Conservation Tool for High-Altitude Tropical Biodiversity	x	Conservation Biology	28	2	446-455	10.1111/cobi.12195	Ecology	past	limnic	terrestrial	plants	2790	na	alpine, tropical	PowerMax® Soil DNA Isolation Kit (QIAGEN)	na	metabarcoding	trnL	76
2014	Giguet-Covex et al. 2014	Long livestock farming history and human landscape shaping revealed by lake sediment DNA	x	Nature Communications	5	3211	1-7	10.1038/ncomms4211	Ecology	past	limnic	terrestrial	plants, animals	3000	na	alpine	Taberlet2012 protocol	12-15	metabarcoding	16S, tnrl	60-84, 65-155
2014	Hou et al. 2014	Identification of Photosynthetic Plankton Communities Using Sedimentary Ancient DNA and Their Response to late-Holocene Climate Change on the Tibetan Plateau	x	Scientific Reports	4	6648	1-9	10.1038/srep06648	Ecology	past	limnic	aquatic	cyanobacteria and eukaryotic phytoplankton groups	3000	climate, salinity, nutrients	alpine	FastDNA® Spin Kit for soil (MP biomedicals)	0.5	PCR-DGGE, qPCR	na	295-410
2014	Randlett et al. 2014	Alkenone distribution in Lake Van sediment over the last 270 ka: influence of temperature and haptophyte species composition	x	Quaternary Science Reviews	104	15	53-62	10.1016/j.quascirev.2014.07.009	Ecology	past	limnic	aquatic	haptophytes	270000	climate	temperate	PowerMax® Soil DNA Isolation Kit (QIAGEN)	2	PCR-DGGE, sequencing	18S rRNA	458
2014	Stoof-Leichsenring et al. 2014	A combined paleolimnological/genetic analysis of diatoms reveals divergent evolutionary lineages of Staurosira and Staurosirella (Bacillariophyta) in Siberian lake sediments along a latitudinal transect	x	Journal of Paleolimnology	57	1	77-93	10.1007/s10933-014-9779-1	Ecology	past	limnic	aquatic	diatoms (Staurosira sp.)	surface sediment	climate, geographic distance	arctic-boreal	PowerSoil® DNA Isolation Kit (QIAGEN)	na	cloning-sequencing	rbcl	70-80
2013	Coolen et al. 2013	Evolution of the plankton paleome in the Black Sea from the Deglacial to Anthropocene	x	Proceedings of the National Academy of Sciences of the United States of America	110	21	1-6	10.1073/pnas.1219283110	Ecology	past	marine/limnic	aquatic	Eukaryotes and copepods	10000	climate, salinity	temperate	PowerMax® Soil DNA Isolation Kit (QIAGEN)	8-10	metabarcoding, PCR-DGGE	18S rRNA, COI	318-500
2013	Domaizon et al. 2013	DNA from lake sediments reveals the long-term dynamics and diversity of Synechococcus assemblages	x	Biogeosciences	10	2	3817-3838	10.5194/bg-10-3817-2013	Ecology	past	limnic	aquatic	cyanobacteria (incl. Synechococcus sp.)	100	climate, nutrients	temperate	UltraClean® Soil DNA Kit (QIAGEN)	1	qPCR	16S rRNA, ITS	275-350
2013	Lejzerowicz et al. 2013a	Ancient DNA complements microfossil record in deep-sea subsurface sediments	x	Deep Sea Research Part II: Topical Studies in Oceanography	1	86-87	214-220	10.1016/j.dsr2.2012.08.008	Methodology	past	marine	aquatic	foraminifera, radiolaria	32500	na	na	PowerSoil® DNA Isolation Kit (QIAGEN)	0.25	metabarcoding	SSU gene	68-196
2013	Lyra et al. 2013	Sediment bacterial communities reflect the history of a sea basin	x	PLoS ONE	8	1	1-8	10.1371/journal.pone.0054326	Ecology	past	marine	aquatic	bacteria	8000	climate, salinity	na	PowerSoil® DNA Isolation Kit (QIAGEN)	0.25	cloning-sequencing	16S rRNA	na
2013	Parducci et al. 2013	Molecular- and pollen-based vegetation analysis in lake sediments from central Scandinavia	x	Molecular Ecology	22	13	3511-3524	10.1111/mec.12298	Ecology	past	limnic	terrestrial	plants	10390	na	boreal	PowerMax® Soil DNA Isolation Kit (QIAGEN)	10	metabarcoding	trnL	76
2013	Pedersen et al. 2013	A comparative study of ancient environmental DNA to pollen and macrofossils from lake sediments reveals taxonomic overlap and additional plant taxa	x	Quaternary Science Reviews	75	1	161-168	10.1016/j.quascirev.2013.06.006	Methodology	past	limnic	terrestrial	plants	10650	na	arctic	PowerMax® Soil DNA Isolation Kit (QIAGEN)	na	metabarcoding	trnL	76
2012	Giosan et al. 2012	Early Anthropogenic Transformation ofthe Danube-Black Sea System	x	Scientific Reports	2	582	1-6	10.1038/srep00582 1	Ecology	past	marine	aquatic	plankton	2500	climate, land clearance, increased terrestrial runoff	temperate	PowerMax® Soil DNA Isolation Kit (QIAGEN)	0.25	metabarcoding	18S rRNA	130
2012	Ishida et al. 2012	DNA extraction and amplification methods for ephippial cases of Daphnia resting eggs in lake sediments: a novel approach for reconstructing zooplankton population structure from the past	x	Limnology	13	3	261-267	10.1007/s10201-012-0380-x	Methodology	past	limnic	aquatic	Daphnia	50	na	temperate	Extraction methods comparison	na	PCR	mt 12S rRNA	136
2012	Parducci et al. 2012	Glacial Survival of Boreal Trees in Northern Scandinavia	x	Science	335	6072	1083-1086	10.1126/science.1216043	Ecology	past	limnic	terrestrial	trees	22000	climate	boreal	PowerMax® Soil DNA Isolation Kit (QIAGEN)	na	metabarcoding	mtDNA	na
2012	Stoof-Leichsenring et al. 2012	Hidden diversity in diatoms of Kenyan Lake Naivasha: a genetic approach detects temporal variation	x	Molecular Ecology	21	8	1918-1930	10.1111/j.1365-294X.2011.05412.x	Ecology	past	limnic	aquatic	diatoms	200	climate	tropical	PowerSoil® DNA Isolation Kit (QIAGEN)	na	cloning-sequencing	rbcl	70-80
2011	Anderson-Carpenter et al. 2011	Ancient DNA from lake sediments: Bridging the gap between paleoecology and genetics	x	BMC Evolutionary Biology	11	30	1-15	10.1186/1471-2148-11-30	Ecology	past	limnic	terrestrial	plants	5000	na	temperate	Phenol-chloroform	na	qPCR	chlDNA	82
2011	Boere et al. 2011a	Source-specific variability in post-depositional DNA preservation with potential implications for DNA based paleoecological records	x	Organic Geochemistry	42	10	1216-1225	10.1016/j.orggeochem.2011.08.005	Methodology	past	marine	aquatic	dinoflagellates, diatoms, anoxygenic photosynthetic green sulfur bacteria	2700	na	antarctic	UltraClean® Soil DNA Kit (QIAGEN)	0.24	PCR-DGGE, Sequencing, qPCR	na	400-500
2011	Boere et al. 2011b	Preservation potential of ancient plankton DNA in Pleistocene marine sediments	x	Geobiology	9	5	377-393	10.1111/j.1472-4669.2011.00290.x	Methodology	past	marine	aquatic	eukaryotes (general); dinoflagellates and diatoms (group-specific)	125000	na	temperate	PowerMax® Soil DNA Isolation Kit (QIAGEN)	0.25	PCR-DGGE, Sequencing, qPCR	na	400-500
2011	Boere et al. 2011c	Exploring preserved fossil dinoflagellate and haptophyte DNA signatures to infer ecological and environmental changes during deposition of sapropel S1 in the eastern Mediterranean	x	Paleoceanography	26	2	PA2204	10.1029/2010PA001948	Ecology	past	marine	aquatic	dinoflagellates, haptophytes	9800	na	temperate	PowerMax® Soil DNA Isolation Kit (QIAGEN)	0.25	PCR-DGGE, Sequencing, qPCR	18S rRNA	500
2011	Coolen 2011	7000 Years of Emiliania huxleyi Viruses in the Black Sea	x	Science	333	6041	451-452	10.1126/science.1200072	Ecology	past	marine	aquatic	Coccolithoviruses and their strain specific hosts (the calcified haptophyte Emiliania huxleyi)	7500	na	temperate	PowerMax® Soil DNA Isolation Kit (QIAGEN)	0.25	PCR-DGGE , Sequencing, qPCR	na	na
2011	Epp et al. 2011	Molecular profiling of diatom assemblages in tropical lake sediments using taxon-specific PCR and Denaturing High-Performance Liquid Chromatography (PCR-DHPLC)	x	Molecular Ecology Resources	11	5	842-853	10.1111/j.1755-0998.2011.03022.x	Methodology	past	limnic	aquatic	diatoms	surface sediment	na	arid	PowerSoil® DNA Isolation Kit (QIAGEN)	na	PCR-DHPLC	SSU gene	na
2011	Savichtcheva et al. 2011	Quantitative PCR Enumeration of Total/Toxic Planktothrix rubescens and Total Cyanobacteria in Preserved DNA Isolated from Lake Sediments	x	Applied and Environmental Microbiology	77	24	8744-8753	10.1128/AEM.06106-11	Methodology	past	limnic	aquatic	cyanobacteria (Planktothrix sp.)	70	na	na	UltraClean® Soil DNA Kit (QIAGEN)	1	qPCR	16S rRNA, ITS	275-350
2011	Xu et al. 2011	DNA extraction, amplification and analysis of the 28S rRNA portion in sediment-buried copepod DNA in the Great Wall Bay and Xihu Lake, Antarctica	x	Journal of Plankton Research	33	6	917-925	10.1093/plankt/fbq165	Methodology	past	limnic	aquatic	copepods	surface sediments	na	polar	Extraction methods comparison	na	Cloning-sequencing	28S rRNA	300
2010	Dong et al. 2010	Impacts of environmental change and human activity on microbial ecosystems on the Tibetan Plateau, NW China	x	GSA Today	20	6	4-10	10.1130/GSATG75A.1	Ecology	past	limnic, ice	aquatic	bacteria	1000	climate, human activities	alpine	na	na	na	na	na
2010	Epp et al. 2010	Historical genetics on a sediment core from a Kenyan lake: Intraspecific genotype turnover in a tropical rotifer is related to past environmental changes	x	Journal of Paleolimnology	43	4	939-954	10.1007/s10933-009-9379-7	Ecology	past	limnic	aquatic	rotifers (Brachionus)	200	volcanism	arid	PowerSoil® DNA Isolation Kit (QIAGEN)	na	Cloning-sequencing	COI mtDNA	153
2010	Madeja et al. 2010	Integrated palynological and molecular analyses of late Holocene deposits from Lake Milkowskie (NE Poland): Verification of local human impact on environment	x	Quaternary International	220	1-2	147-152	10.1016/j.quaint.2009.09.008	Ecology	past	limnic	terrestrial	Bifidobacterium sp., Bacteroides-Prevotella	3000	na	boreal	Custom protocol	na	PCR, nested PCR	na	na
2009	Boere et al. 2009	Late-Holocene succession of dinoflagellates in an Antarctic fjord using a multi-proxy approach: paleoenvironmental genomics, lipid biomarkers and palynomorphs	x	Geobiology	7	3	264-281	10.1111/j.1472-4669.2009.00202.x	Ecology	past	marine	aquatic	dinoflagellates	3000	Sea ice cover	polar	UltraClean® Soil DNA Kit (QIAGEN)	0.25	PCR-DGGE	18S rRNA	465
2009	Coolen et al. 2009	DNA and lipid molecular stratigraphic records of haptophyte succession in the Black Sea during the Holocene	x	Earth and Planetary Science Letters	284	3-4	610-621	10.1016/j.epsl.2009.05.029	Ecology	past	marine	aquatic	haptophytes	7550	postglacial marine reconnection	temperate	PowerMax® Soil DNA Isolation Kit (QIAGEN)	0.25	PCR-DGGE, sequencing	18S rRNA	458
2009	Haile et al 2009	Ancient DNA reveals late survival of mammoth and horse in interior Alaska	x	Proceedings of the National Academy of Sciences of the United States of America	106	52	22352-22357	10.1073/pnas.0912510106	Ecology	past	limnic, cave	terrestrial	mammoth, horse	15000	na	arctic	Custom protocol	na	na	na	na
2008	Coolen et al. 2008	Sources for sedimentary bacteriohopanepolyols as revealed by 16S rDNA stratigraphy	x	Environmental Microbiology	10	7	1783-1803	10.1111/j.1462-2920.2008.01601.x	Ecology	past	marine	aquatic	methanotrophs, cyanobacteria	10000	Postglacial marine reconnection	polar	PowerMax® Soil DNA Isolation Kit (QIAGEN)	0.25	PCR-DGGE, qPCR	16S rRNA	400-900
2008	Corinadelsi et al. 2008	Damage and degradation rates of extracellular DNA in marine sediments: implications for the preservation of gene sequences	x	Molecular Ecology	17	17	3939-3951	10.1111/j.1365-294X.2008.03880.x	Methodology	past	marine	aquatic	bacteria	10000	na	na	Custom protocol	na	PCR	16S rRNA	na
2008	Manske et al. 2008	Subfossil 16S rRNA Gene Sequences of Green Sulfur Bacteria in the Black Sea and Their Implications for Past Photic Zone Anoxia	x	Applied and Environmental Microbiology	74	3	624-632	10.1128/AEM.02137-07	Ecology	past	marine	aquatic	Anoxygenic phtosynthetic green sulfur bacteria	7200	climate, stratification, photic zone euxinia	temperate	UltraClean® Soil DNA Kit (QIAGEN)	5-10	PCR-DGGE, sequencing	16S rRNA	481
2008	Matisoo-Smith et al. 2008	Recovery of DNA and pollen from New Zealand lake sediments	x	Quaternary International	184	1	139-149	10.1016/j.quaint.2007.09.013	Methodology	past	limnic	terrestrial	bacteria	3800	na	temperate	FastDNA® Spin Kit for soil (MP biomedicals)	na	PCR	mtDNA	na
2007	Coolen & Overmann 2007	217 000-year-old DNA sequences of green sulfur bacteria in Mediterranean sapropels and their implications for the reconstruction of the paleoenvironment	x	Environmental Microbiology	9	1	238-249	10.1111/j.1462-2920.2006.01134.x	Methodology	past	marine	aquatic	Anoxygenic phtosynthetic green sulfur bacteria	217000	Milankovitch cyclicity, photic zone euxinia	temperate	Custom protocol	0.25	PCR-DGGE, sequencing	16S rRNA	481
2007	Coolen et al. 2007	Identification of organic matter sources in sulfidic Late Holocene Antarctic fjord sediments from fossil rDNA sequence analysis	x	Paleoceanography	22	1	PA2211	10.1029/2006PA001309,	Ecology	past	marine	aquatic	diatoms	2700	climate, sea level changes	polar	UltraClean® Soil DNA Kit (QIAGEN)	0.25	PCR-DGGE, sequencing, qPCR	16S rRNA	498
2007	Nelson et al. 2007	Bacterial Diversity and Distribution in the Holocene Sediments of a Northern Temperate Lake	x	Microbial Ecology	54	2	252-263	10.1007/s00248-006-9195-	Ecology	past	limnic	aquatic	bacteria, archaea	11000	climate	temperate	Custom protocol	0.2	PCR- DGGE	16S rRNA	250
2007	Takishita et al. 2007	Genetic Diversity of Microbial Eukaryotes in Anoxic Sediment of the Saline Meromictic Lake Namako-ike (Japan): On the Detection of Anaerobic or Anoxic-tolerant Lineages of Eukaryotes	x	Protist	158	1	51-64	10.1016/j.protis.2006.07.003	Methodology	past and present	limnic	aquatic	protists	surface sediments	na	temperate	UltraClean® Soil DNA Kit (QIAGEN)	na	Cloning-sequencing	18S rRNA	na
2006	Coolen et al. 2006a	Ancient DNA derived from alkenone-biosynthesizing haptophytes and other algae in Holocene sediments from the Black Sea	x	Paleoceanography	21	1	PA1005	10.1029/2005PA001188	Ecology	past	limnic to coastal marine	aquatic	haptophytes (group-specific)	3600	Biological sources of fossil lipid biomarkers	temperate	UltraClean® Soil DNA Kit (QIAGEN)	0.25	PCR-DGGE	18S rRNA	458
2006	Coolen et al. 2006b	Sulfur and methane cycling during the Holocene in ace lake (Antarctica) revealed by lipid and DNA stratigraphy	x	Earth and Environmental Sciences	64	1	1-x	10.1007/1-4020-4297-3_03	Ecology	past	limnic-marine lake	aquatic	Anoxygenic photosynthetic green sulfur bacteria and microaerophilic methanotrophs	10450	Past biogeochemical cycling	polar	UltraClean® Soil DNA Kit (QIAGEN)	0.25	PCR-DGGE	16S rRNA	499
2005	Bisset et al. 2005	Isolation, amplification, and identification of ancient copepod DNA from lake sediments	x	Limnology and Oceanography Methods	3	12	533-542	10.4319/lom.2005.3.533	Methodology	past	limnic	aquatic	copepods	65000	na	polar	Soil DNA extraction Kit (Bio101)	0.5	Cloning-sequencing	28S rRNA	300
2005	Corinadelsi et al. 2005	Simultaneous Recovery of Extracellular and Intracellular DNA Suitable for Molecular Studies from Marine Sediments	x	Applied and Environmental Microbiology	71	1	46-50	10.1128/AEM.71.1.46–50.2005	Methodology	past	marine	aquatic	bacteria	surface sediments	na	na	Custom protocol	2.5	PCR	16S rRNA	na
2005	Dell'Anno and Danovaro 2005	Extracellular DNA Plays a Key Role in Deep-Sea Ecosystem Functioning	x	Science	309	5744	2179	10.1126/science.1117475	Methodology	past	marine	aquatic	na	na	na	na	Custom protocol	na	na	na	na
2005	Inagaki et al. 2005	Microbial survival: The paleome: A sedimentary genetic record of past microbial communities	x	Astrobiology	4	2	141-153	10.1089/ast.2005.5.141	Methodology	past	Cretaceous marine black shales	aquatic	bacteria	100000000	Global oceanic euxinia	na	Soil DNA Kit Mega Prep (MO BIO)	10	cloning-sequencing	16s rRNA	400
2004	Coolen et al. 2004a	Combined DNA and lipid analyses of sediments reveal changes in Holocene haptophyte and diatom populations in an Antarctic lake	x	Earth and Planetary Science Letters	223	1	225-239	10.1016/j.epsl.2004.04.014	Ecology	past	limnic-marine lake	aquatic	haptophytes, diatoms	10000	Postglacial marine reconnection	polar	UltraClean® Soil DNA Kit (QIAGEN)	0.25	PCR-DGGE, sequencing, qPCR	18S rRNA	498-556
2004	Coolen et al. 2004b	Evolution of the methane cycle in Ace Lake (Antarctica) during the Holocene: Response of methanogens and methanotrophs to environmental change	x	Organic Geochemistry	35	10	1151-67	10.1016/j.orggeochem.2004.06.009	Ecology	past and present	limnic-marine lake	aquatic	Active methanogenic archaea vs. past Group I methanotrophs	3500	Past cycling of methane in stratified lake	polar	UltraClean® Soil DNA Kit (QIAGEN)	0.25	PCR-DGGE, Sequencing, qPCR	16s rRNA	362-396
2004	Dell'Anno and Corinaldesi 2004	Degradation and Turnover of Extracellular DNA in Marine Sediments: Ecological and Methodological Considerations	x	Applied and Environmental Microbiology	70	7	4384-86	10.1128/AEM.70.7.4384–4386.2004	Methodology	past	marine	aquatic	na	na	na	na	Custom protocol	1	na	na	na
2002	Dell'Anno et al. 2002	Quantification, base composition, and fate of extracellular DNA in marine sediments	x	Limnology and Oceanography	47	3	899-905	10.4319/lo.2002.47.3.0899	Methodology	past	marine	aquatic	na	na	na	na	Custom protocol	1	quantification	na	na
1998	Coolen & Overmann 1998	Analysis of subfossil molecular remains of purple sulfur bacteria in a lake sediment	x	Applied and Environmental Microbiology	64	11	4513-21	10.1128/AEM.64.11.4513-4521.1998	Ecology	past	marine lake	aquatic	anoxygenic photostynthetic purple sulfur bactera	9100	climate, stratification, photic zone euxinia	Temperate	Custom protocol	na	PCR-DGGE, sequencing	16S rRNA	461
